# Supplementary material
Source: PubMed Central journal article supplement (PMC3668708)
Supplement: supp_M113.464461_jbc.M113.464461-1.pdf [file supp_M113.464461_jbc.M113.464461-1.pdf]

## Supplemental Figure S1, Sandbo *et al*

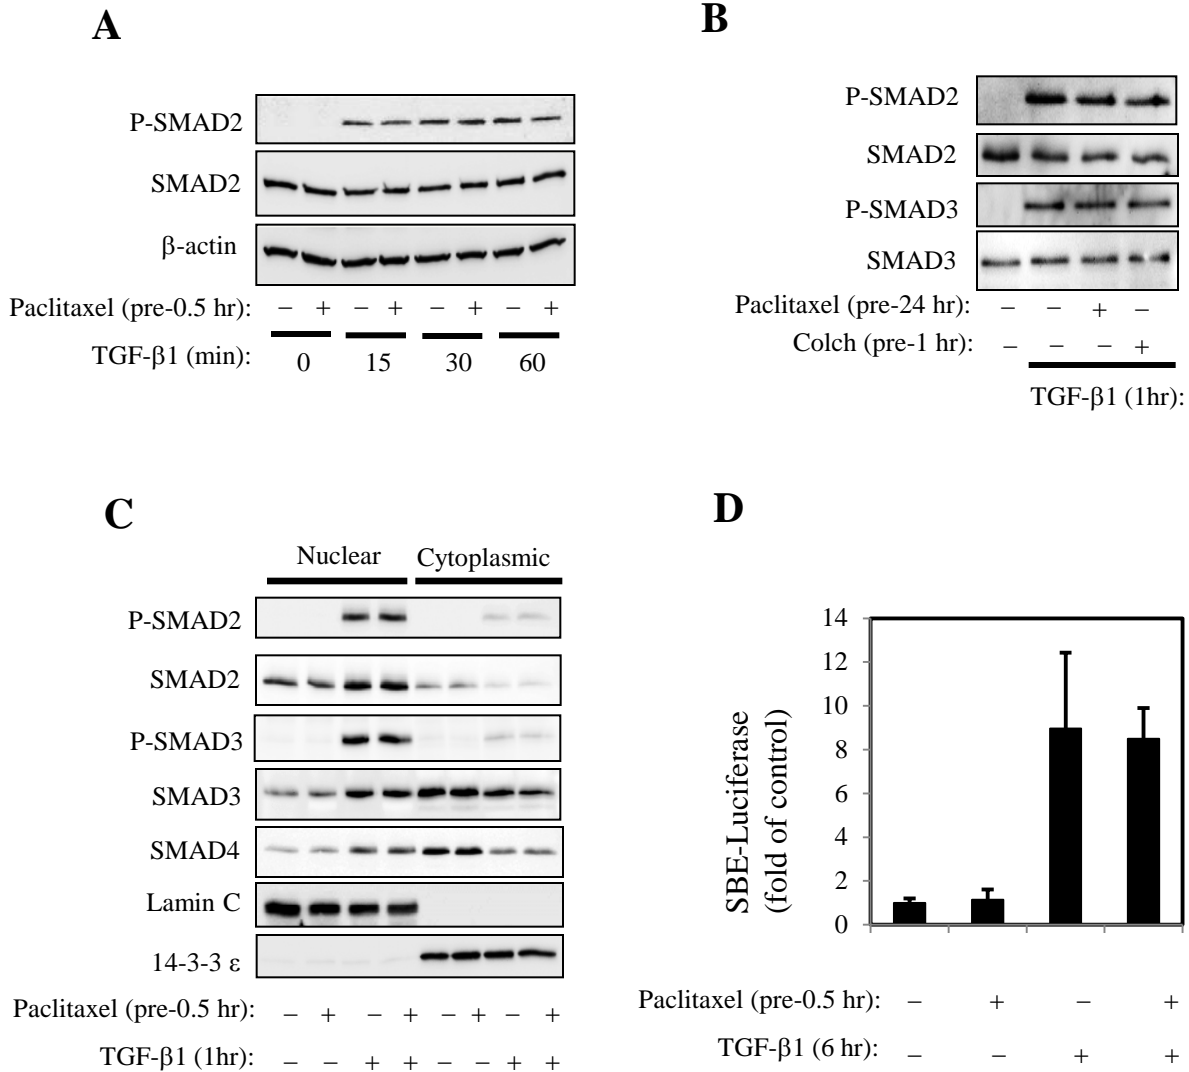

**Figure S1. Paclitaxel does not affect TGF- $\beta$ 1 induced Smad signaling.** HLF were pretreated with 10  $\mu$ M paclitaxel or 1  $\mu$ M colchicine for the time indicated, followed by stimulation with 1 ng/ml TGF- $\beta$ 1 for the times indicated. Cells were analyzed for phosphorylation of Smad2/3 by Western blotting with corresponding phosphor-specific antibodies (A, B), for nuclear translocation of Smad2/3/4 by *in vitro* fractionation (C), or for activation of SBE-luciferase reporter (D).

## Supplemental Figure S2, Sandbo *et al*

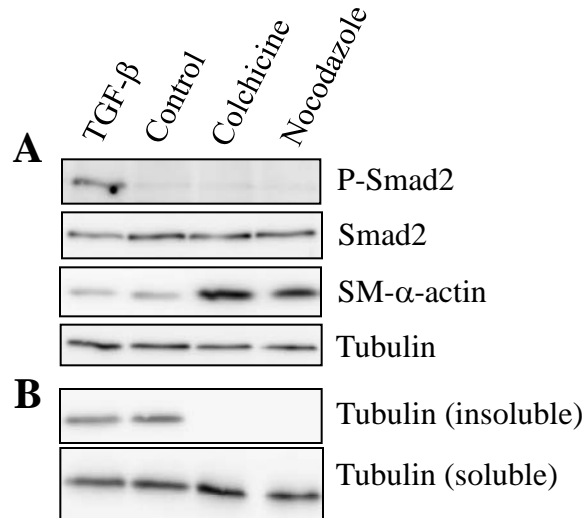

**Figure S2. Colchicine or nocodazole have no effect on Smad phosphorylation in C2C12 cells.** Confluent C2C12 cells were placed in DMEM containing 2% horse serum and were treated with 1  $\mu$ M colchicine for 24 hours, 5  $\mu$ g/ml (16.7  $\mu$ M) nocodazole for 24 hours, or 10 ng/ml TGF- $\beta$ 1 for 1 hour as control. **A**, total cell lysates were analyzed by Western blotting with desired antibodies as indicated. **B**, Soluble and insoluble (microtubule) fractions were prepared and examined by Western blotting with  $\beta$ -tubulin antibodies.

As shown, neither colchicine, nor nocodazole affected Smad2 phosphorylation while inducing depolymerization of tubulin and expression of SM- $\alpha$ -actin under these conditions.
